# Supplementary material for: Reconciling tradeoffs among hydropower, decarbonization, and freshwater biodiversity through carbon offsets
Source: Research Square preprint supplement (doi:10.21203/rs.3.rs-8662997/v1), 2026-01-29
Supplement: Supplementary file 1 [file d7c59bd06bb1100477405218.docx]

Supplementary Materials for

**Reconciling tradeoffs among hydropower, decarbonization, and freshwater biodiversity through carbon offsets**

Sebastian A. Heilpern1,2*, Felipe S. Pacheco3, Marc Grimson4, Suresh A. Sethi5, Zhongdi Qu4, Rafael M. Almeida6, Yue Mao4, Imanol Miqueleiz7, Andrew C. Wilcox8, Rebecca Mast9, Maria Camila Mejia Garcia10, Guido A. Herrera-R3, Hector Angarita11, A.F.M. Kamal Chowdhury12, Bridget R. Deemer13, Peter B. McIntyre7, Marcela Miranda3, Hansapani Rodrigo10, Rafael J.P. Schmitt14, Steven Thomas15, Thomas B. Wild12, Christiane Zarfl9, Carla Gomes4*, Alexander S. Flecker3*

*Corresponding author. Email: [heilpern@stanford.edu](mailto:heilpern@stanford.edu), gomes@cs.cornell.edu, asf3@cornell.edu

**This PDF file includes:**

Figs. S1 to S12

Table S1 to S2

**
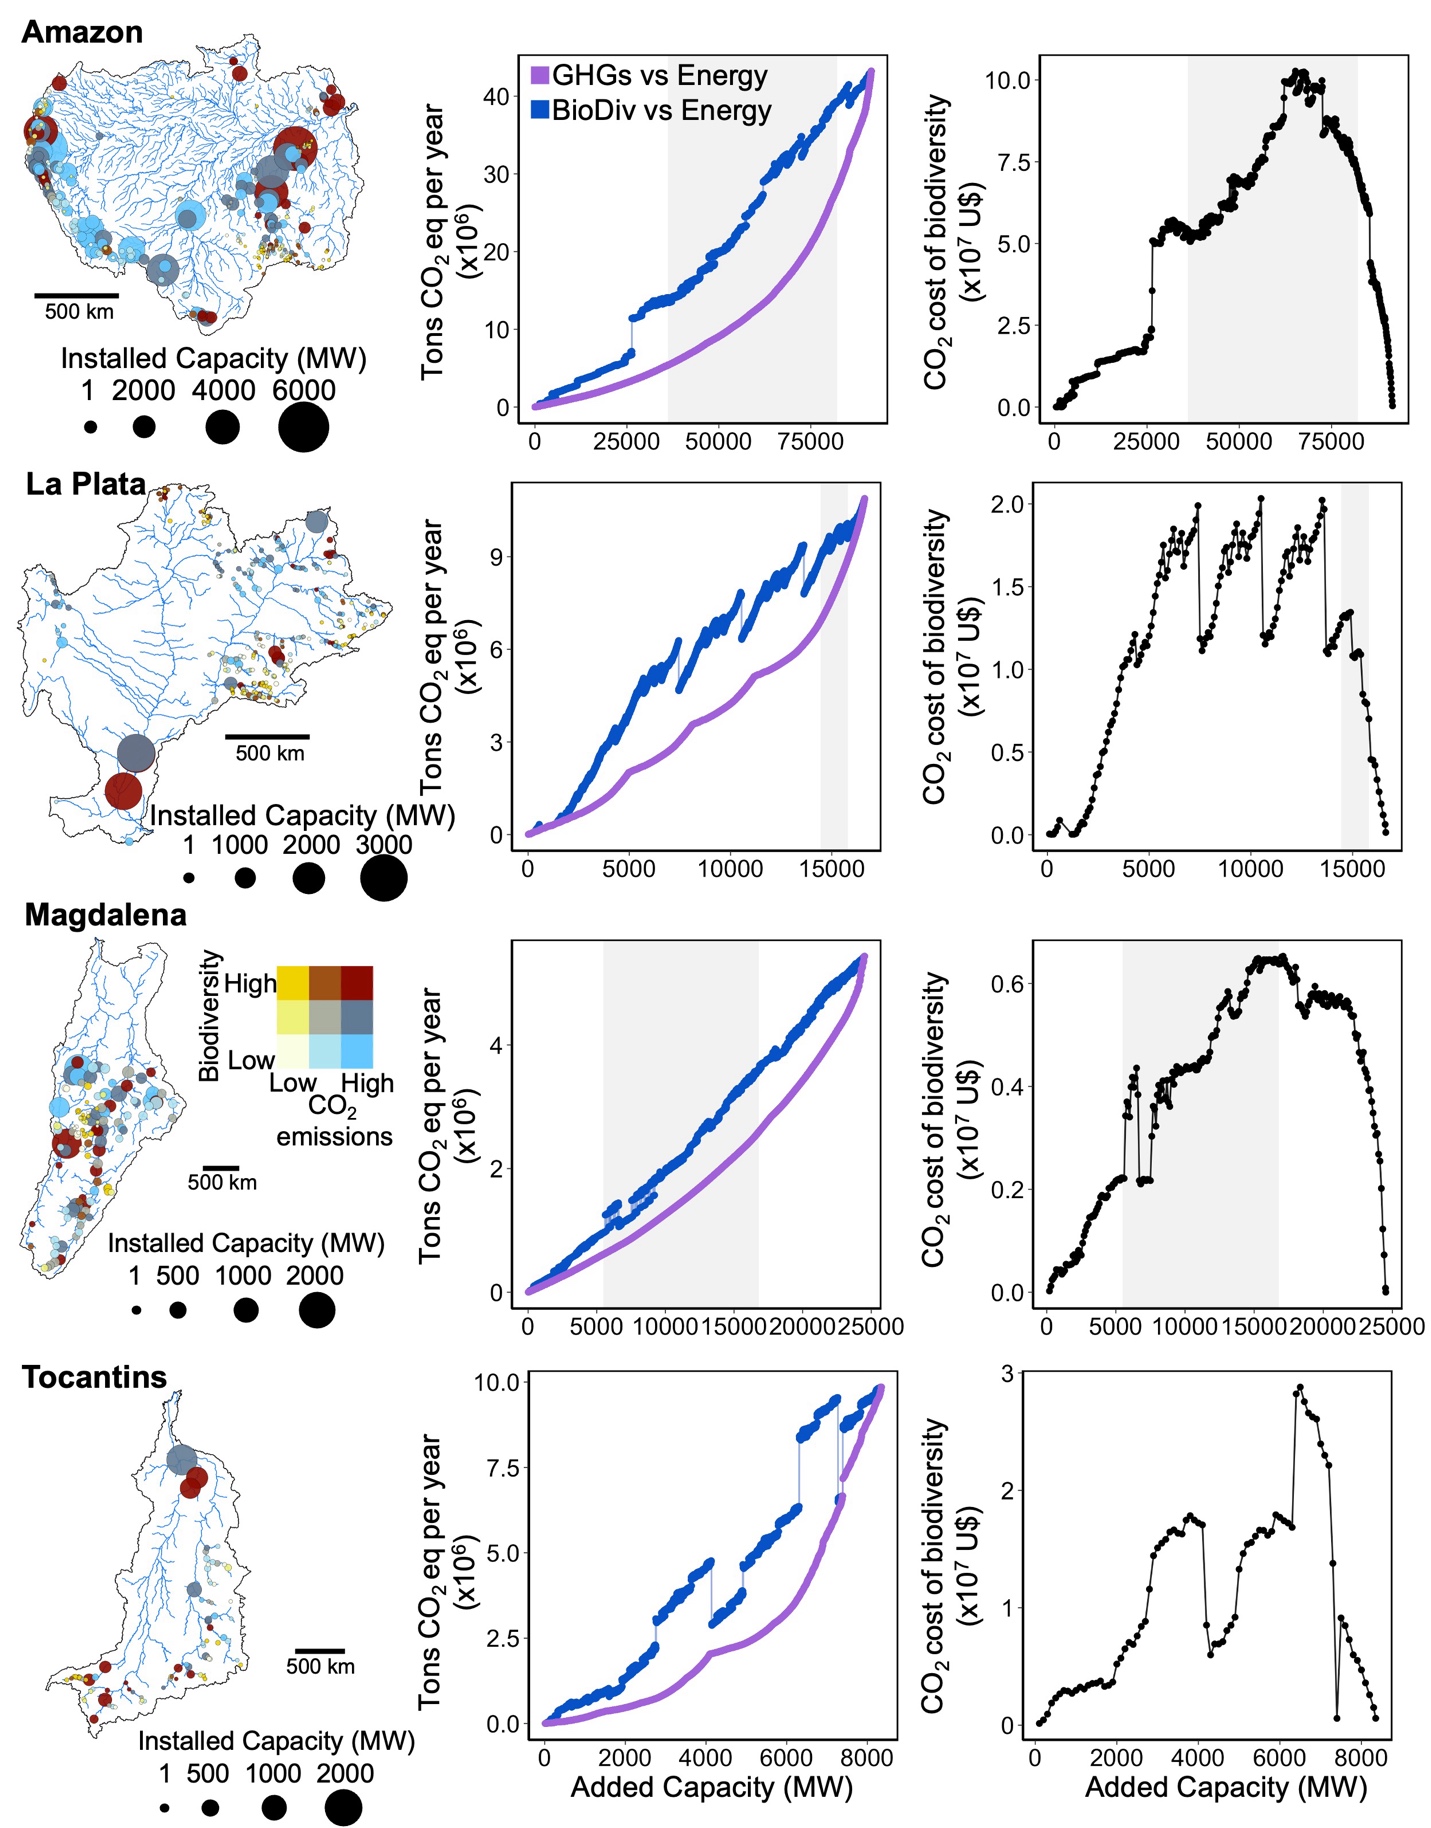
**

**Fig. S1. Biodiversity-centered hydropower planning can result in higher carbon emissions than low-carbon planning in South American basins.** First column: dams vary in their biodiversity impacts, carbon emissions and energy capacity. Second column: Thus, basin-wide Pareto optimal solutions for low-carbon hydropower planning (purple) emit less carbon than Pareto optimal solutions for biodiversity-centered planning (blue). Third column: Offsetting carbon emissions from biodiversity-centered planning to levels equivalent to those associated with lowest-carbon dam portfolios depends on the additional capacity installed, and varies across basins. The grey shaded area represents the potential range of future hydropower expansion for each basin from ref. (*10*).

**
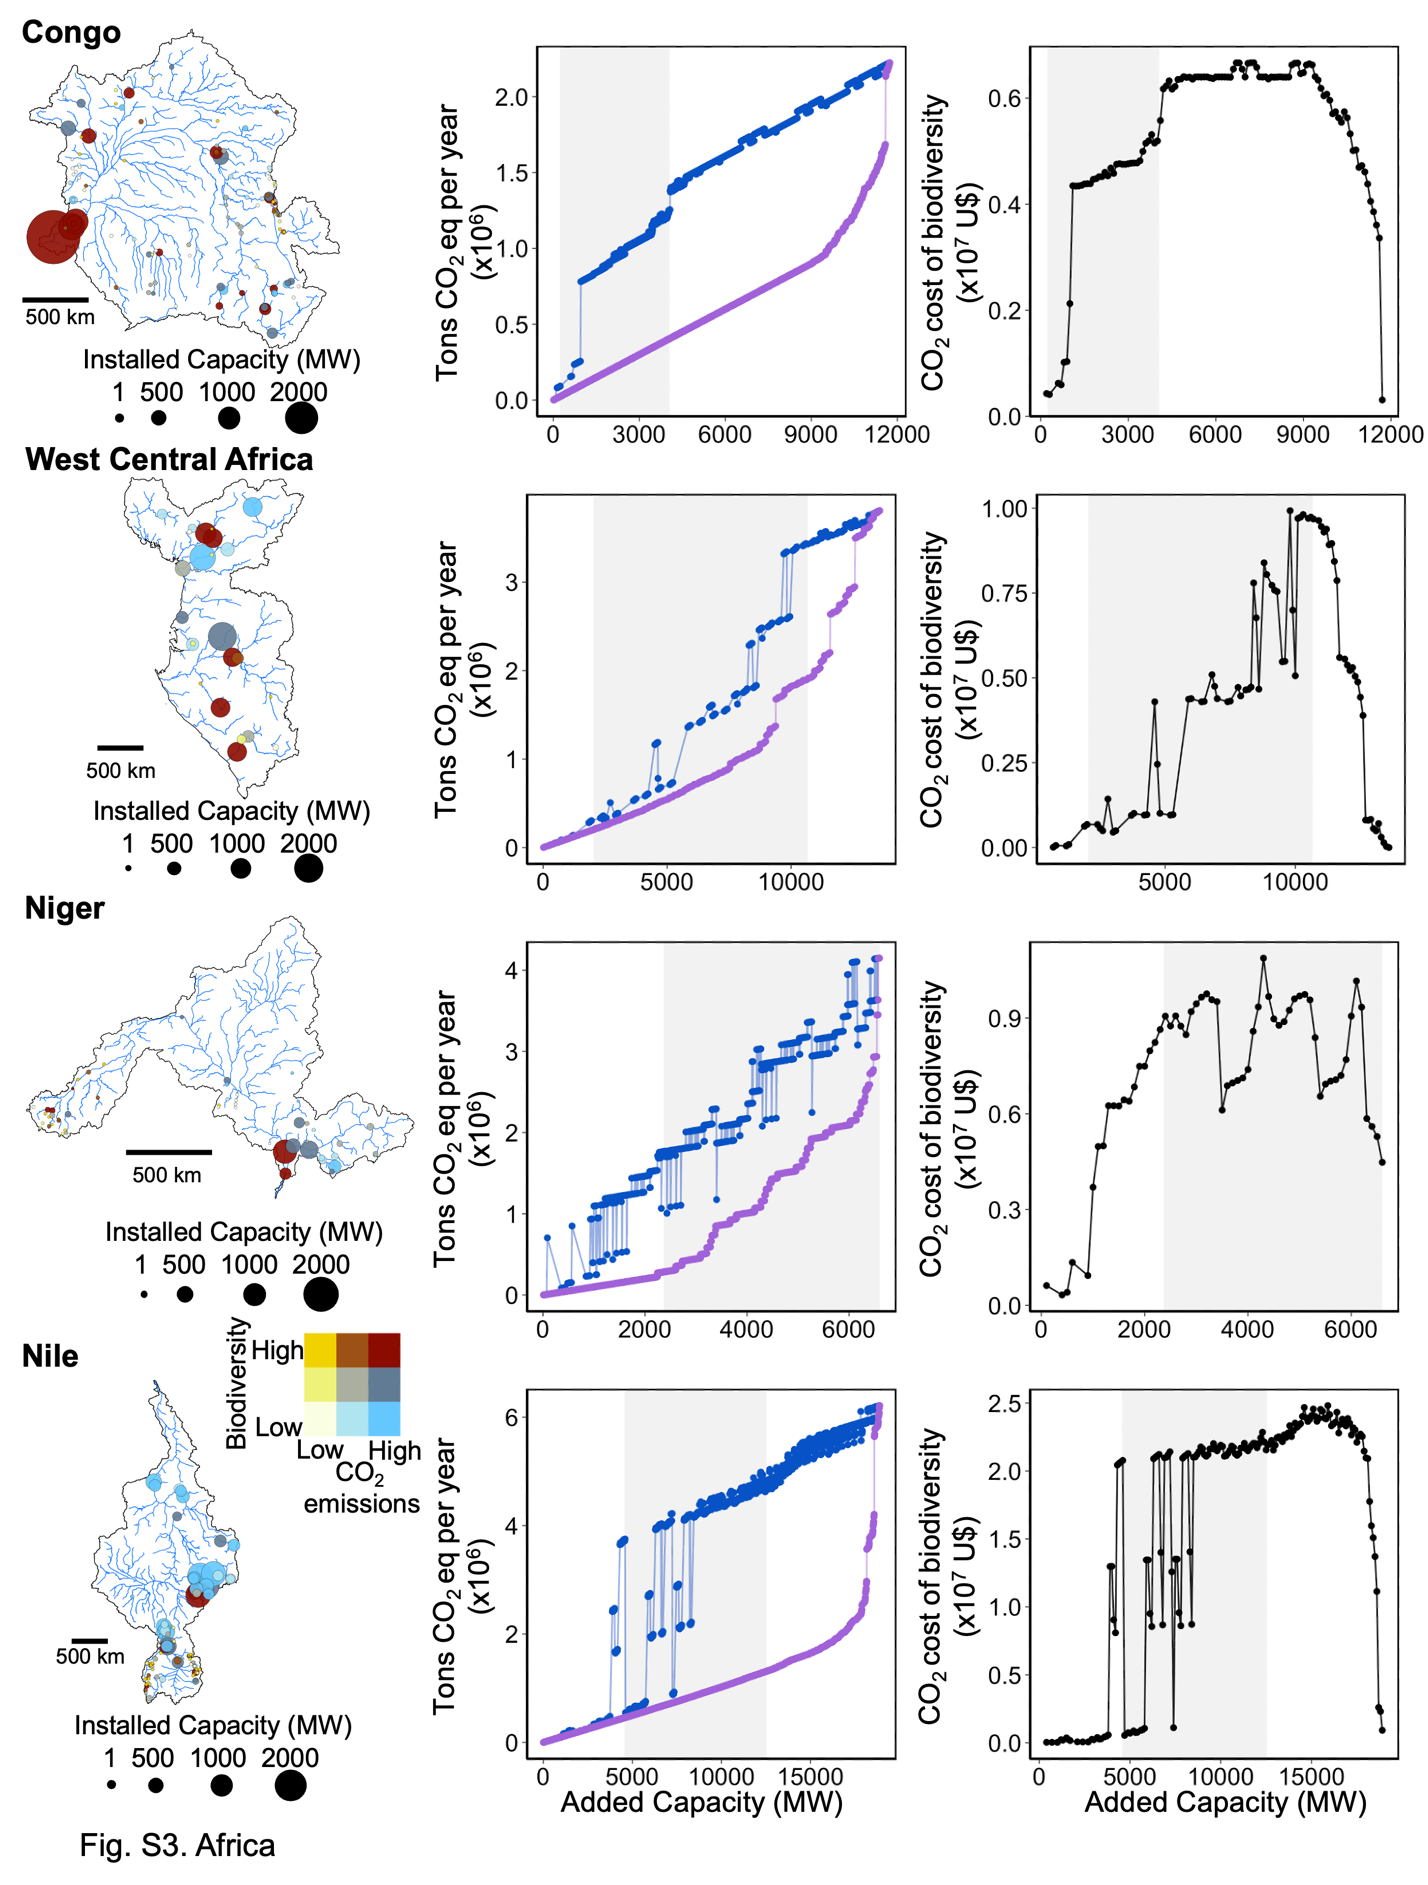

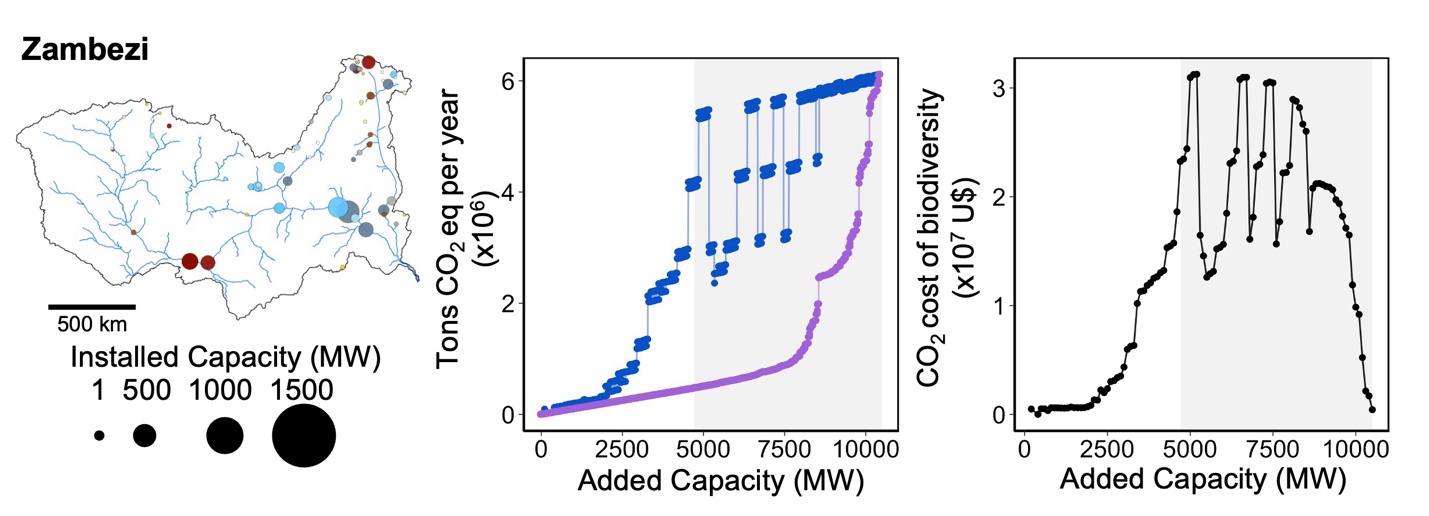
**

**Fig. S2. Biodiversity-centered hydropower planning can result in higher carbon emissions than low-carbon planning in African basins.** First column: dams vary in their biodiversity impacts, carbon emissions and energy capacity. Second column: Thus, basin-wide Pareto optimal solutions for low-carbon hydropower planning (purple) emit less carbon than Pareto optimal solutions for biodiversity-centered planning (blue). Third column: Offsetting carbon emissions from biodiversity-centered planning to levels equivalent to those associated with lowest-carbon dam portfolios depends on the additional capacity installed, and varies across basins. The grey shaded area represents the potential range of future hydropower expansion for each basin from ref. (*10*).

**
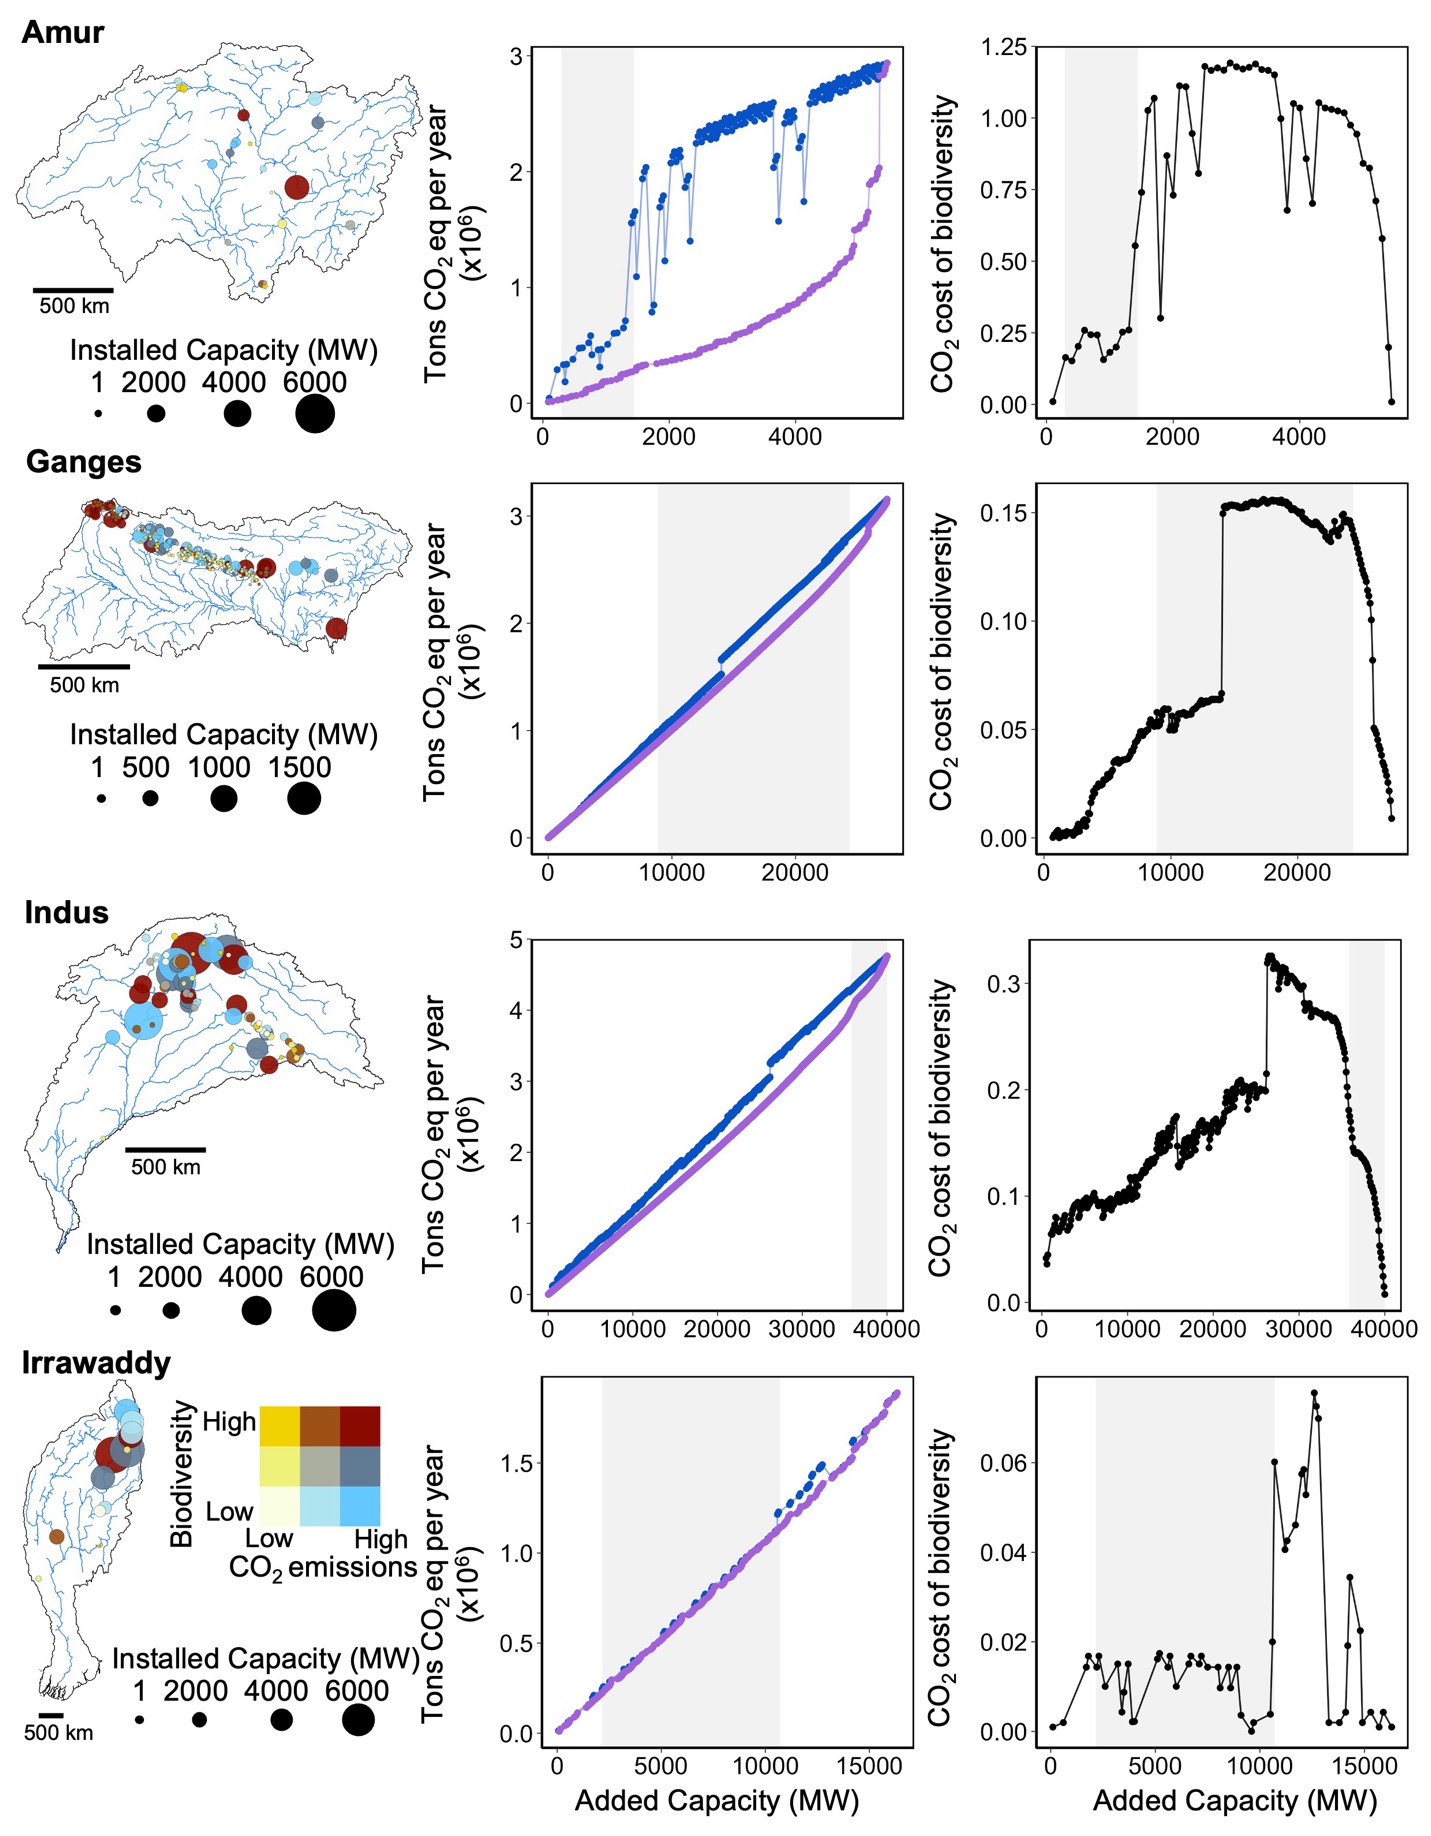
**

**Fig. S3. Biodiversity-centered hydropower planning can result in higher carbon emissions than low-carbon planning in a subset of Asian basins.** First column: dams vary in their biodiversity impacts, carbon emissions and energy capacity. Second column: Thus, basin-wide Pareto optimal solutions for low-carbon hydropower planning (purple) emit less carbon than Pareto optimal solutions for biodiversity-centered planning (blue). Third column: Offsetting carbon emissions from biodiversity-centered planning to levels equivalent to those associated with lowest-carbon dam portfolios depends on the additional capacity installed, and varies across basins. The grey shaded area represents the potential range of future hydropower expansion for each basin from ref. (*10*).


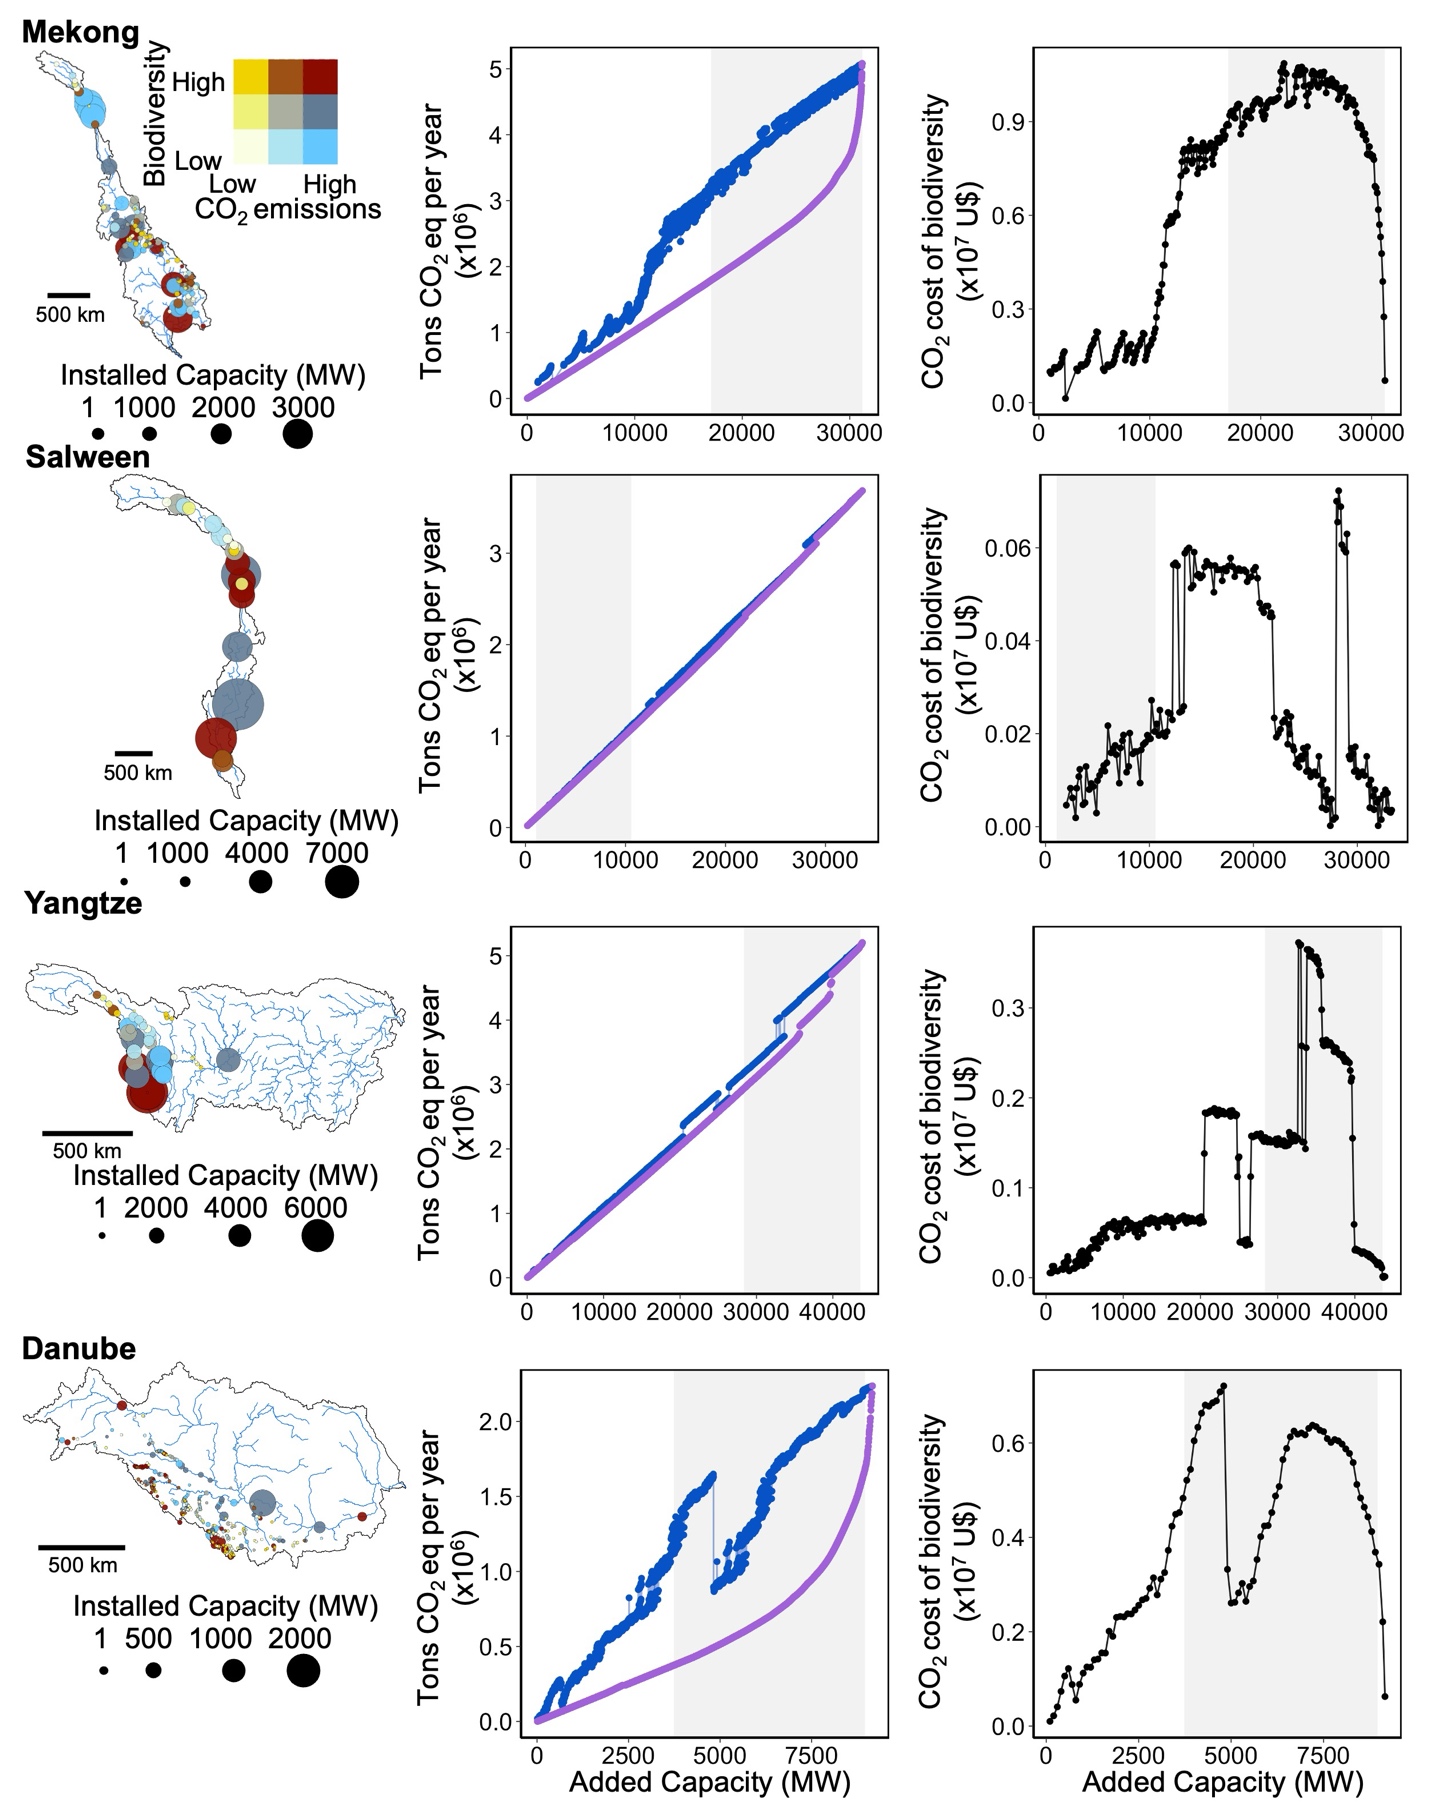


**Fig. S4. Biodiversity-centered hydropower planning can result in higher carbon emissions than low-carbon planning in the second subset of Asian basins.** First column: dams vary in their biodiversity impacts, carbon emissions and energy capacity. Second column: Thus, basin-wide Pareto optimal solutions for low-carbon hydropower planning (purple) emit less carbon than Pareto optimal solutions for biodiversity-centered planning (blue). Third column: Offsetting carbon emissions from biodiversity-centered planning to levels equivalent to those associated with lowest-carbon dam portfolios depends on the additional capacity installed, and varies across basins. The grey shaded area represents the potential range of future hydropower expansion for each basin from ref. (*10*).

**
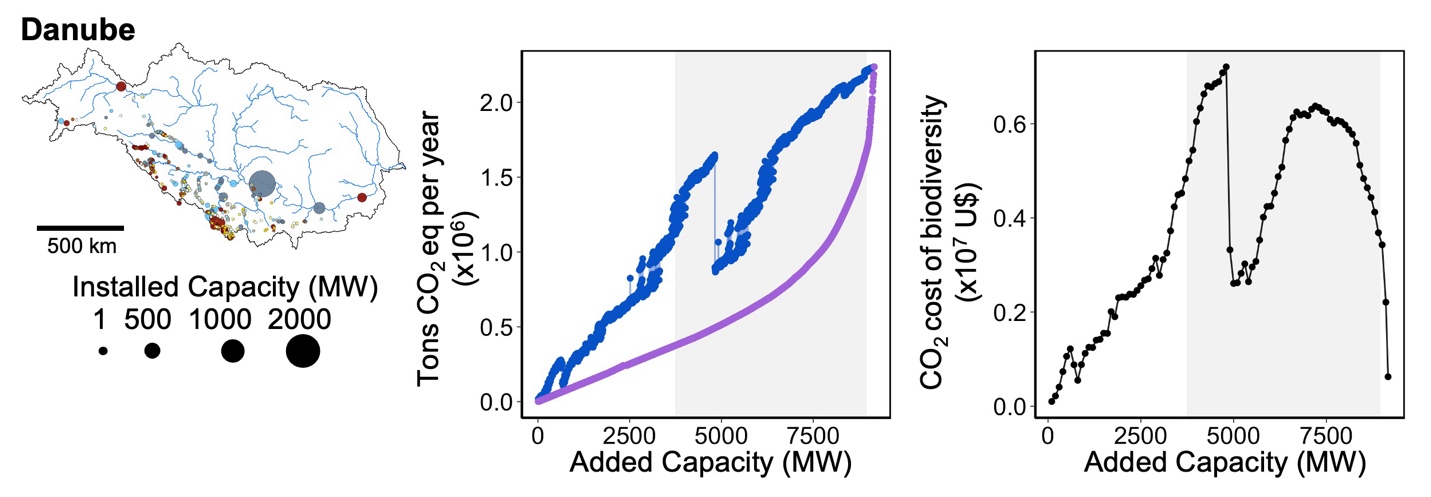
Fig. S5. Biodiversity-centered hydropower planning can result in higher carbon emissions than low-carbon planning in the Danube.** First column: dams vary in their biodiversity impacts, carbon emissions and energy capacity. Second column: Thus, basin-wide Pareto optimal solutions for low-carbon hydropower planning (purple) emit less carbon than Pareto optimal solutions for biodiversity-centered planning (blue). Third column: Offsetting carbon emissions from biodiversity-centered planning to levels equivalent to those associated with lowest-carbon dam portfolios depends on the additional capacity installed, and varies across basins. The grey shaded area represents the potential range of future hydropower expansion for each basin from ref. (*10*).


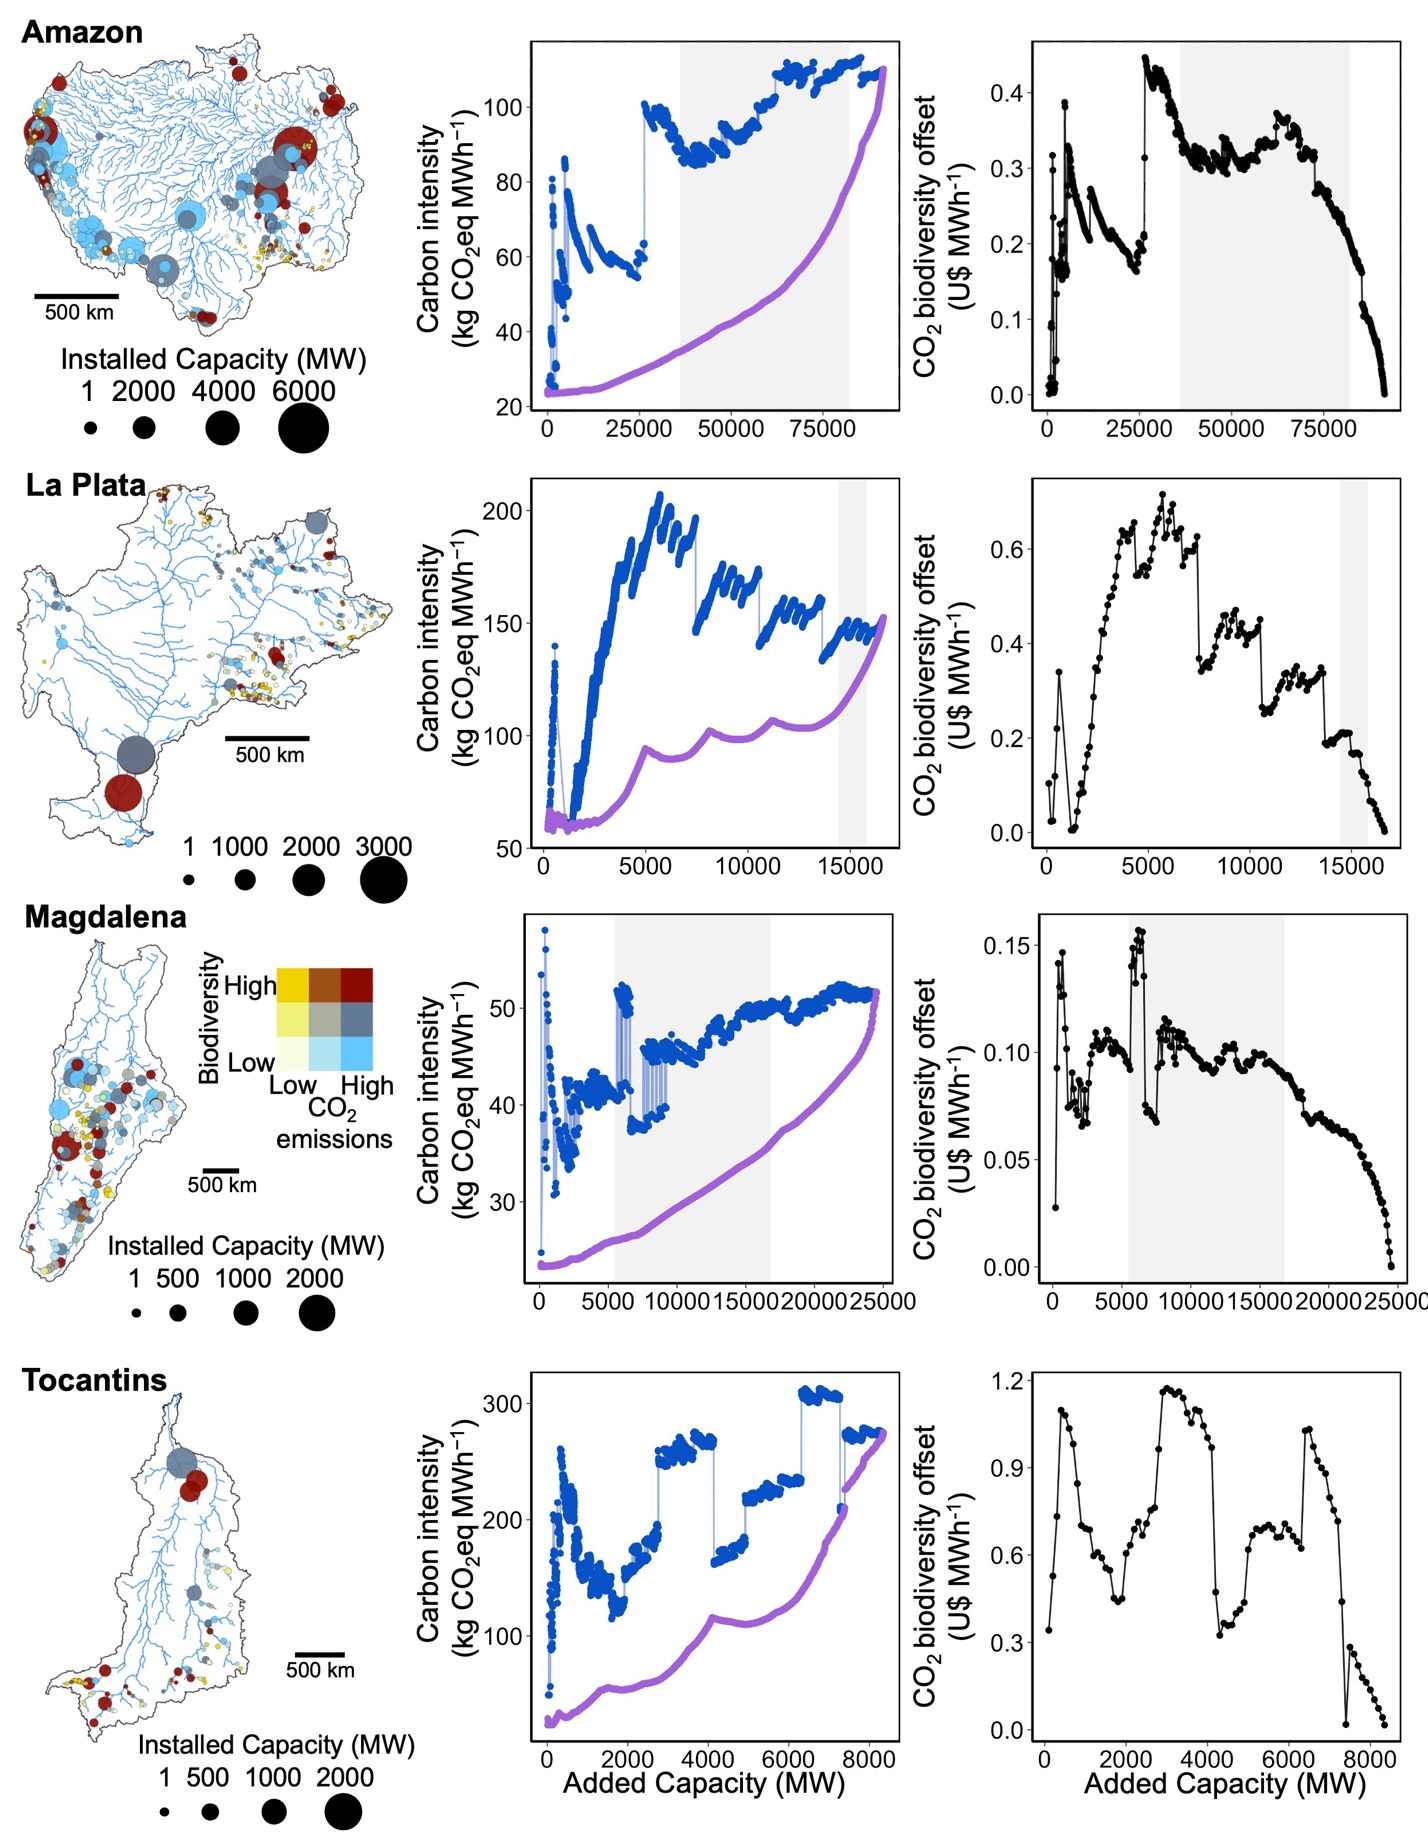


**Fig. S6. Biodiversity-centered hydropower planning can more than triple carbon intensities in comparison to low-carbon planning in South American basins.** First column: Dams vary in their biodiversity impacts, carbon emissions and energy capacity. Second column: Thus, basin-wide Pareto optimal solutions for low-carbon hydropower planning (purple) have lower carbon intensities than Pareto optimal solutions for biodiversity-centered planning (blue). Third column: Offsetting carbon emissions from biodiversity-centered planning to levels equivalent to those associated with lowest-carbon dam portfolios depends on the additional capacity installed, and varies across basins. The grey shaded area represents the potential range of future hydropower expansion for each basin from ref. (*10*).

**
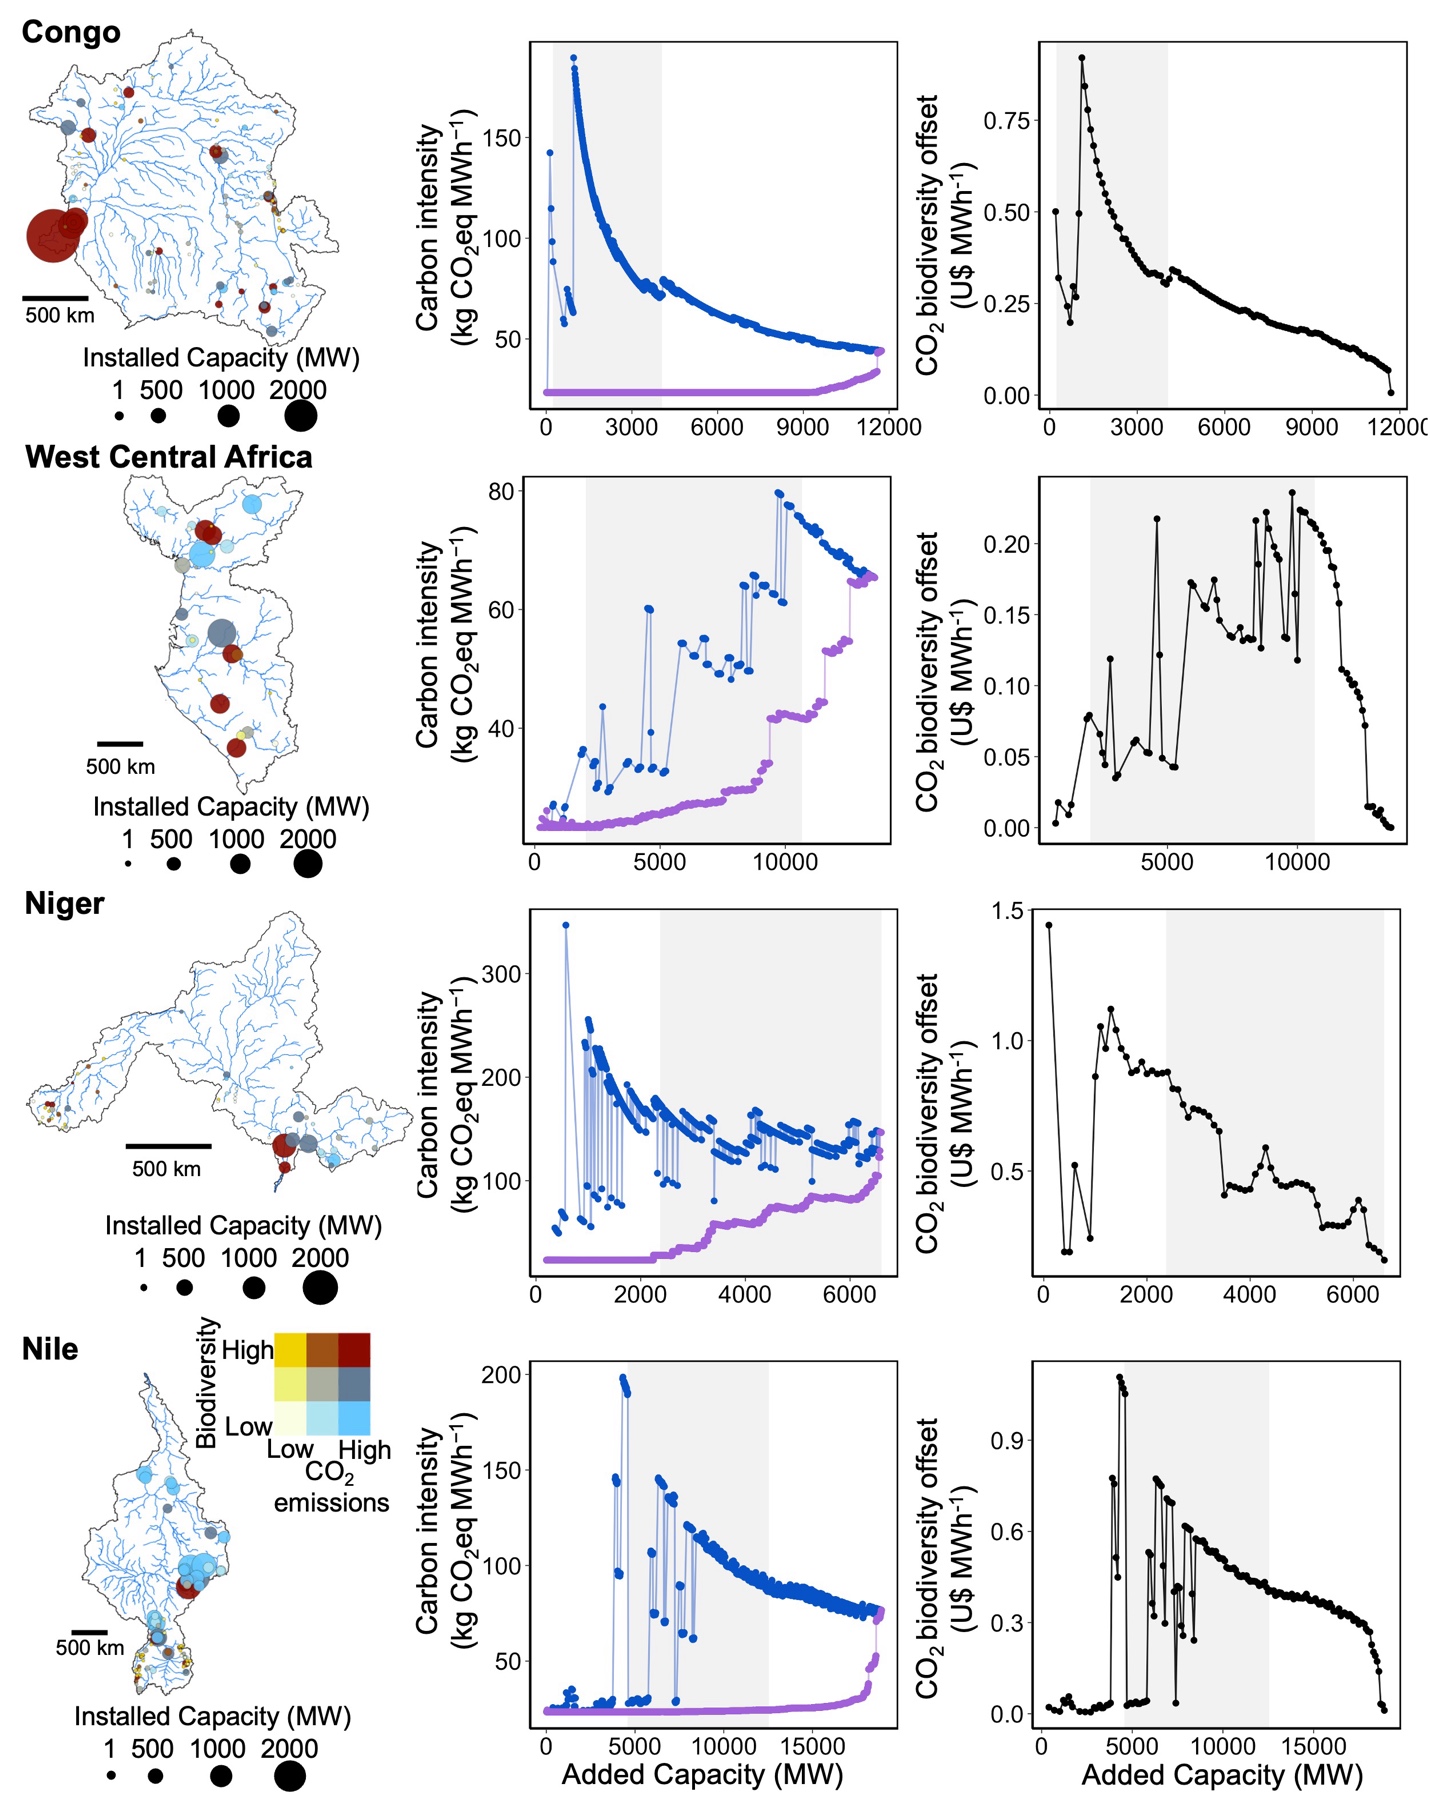
**

**
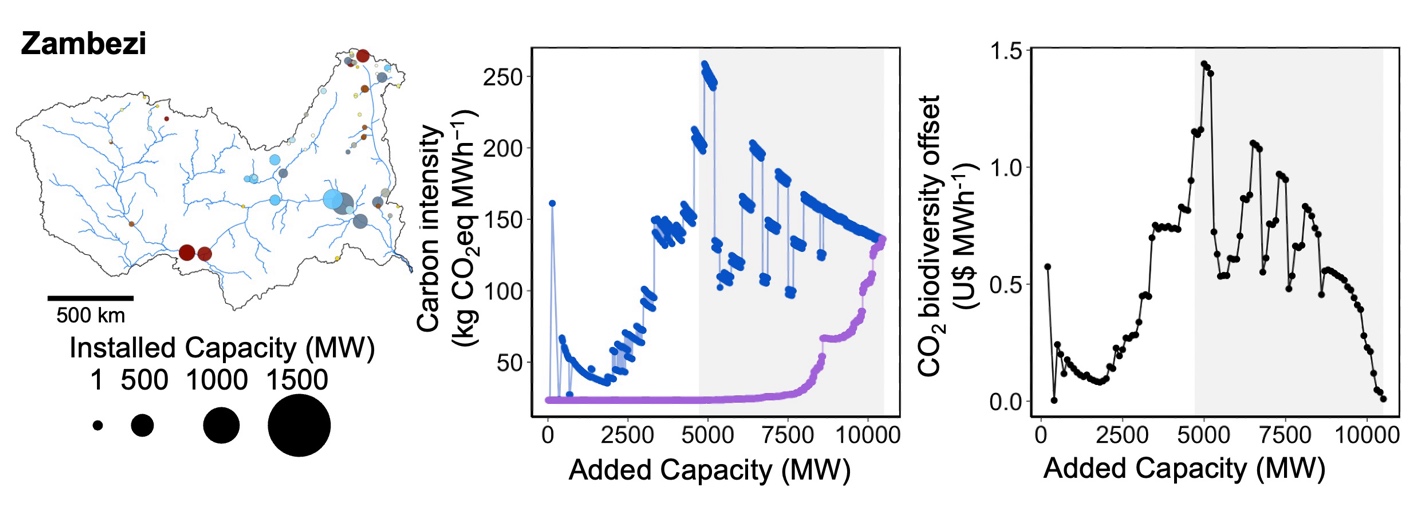
Fig. S7. Biodiversity-centered hydropower planning can more than triple carbon intensities in comparison to low-carbon planning in African basins.** First column: Dams vary in their biodiversity impacts, carbon emissions and energy capacity. Second column: Thus, basin-wide Pareto optimal solutions for low-carbon hydropower planning (purple) have lower carbon intensities than Pareto optimal solutions for biodiversity-centered planning (blue). Third column: Offsetting carbon emissions from biodiversity-centered planning to levels equivalent to those associated with lowest-carbon dam portfolios depends on the additional capacity installed, and varies across basins. The grey shaded area represents the potential range of future hydropower expansion for each basin from ref. (*10*).


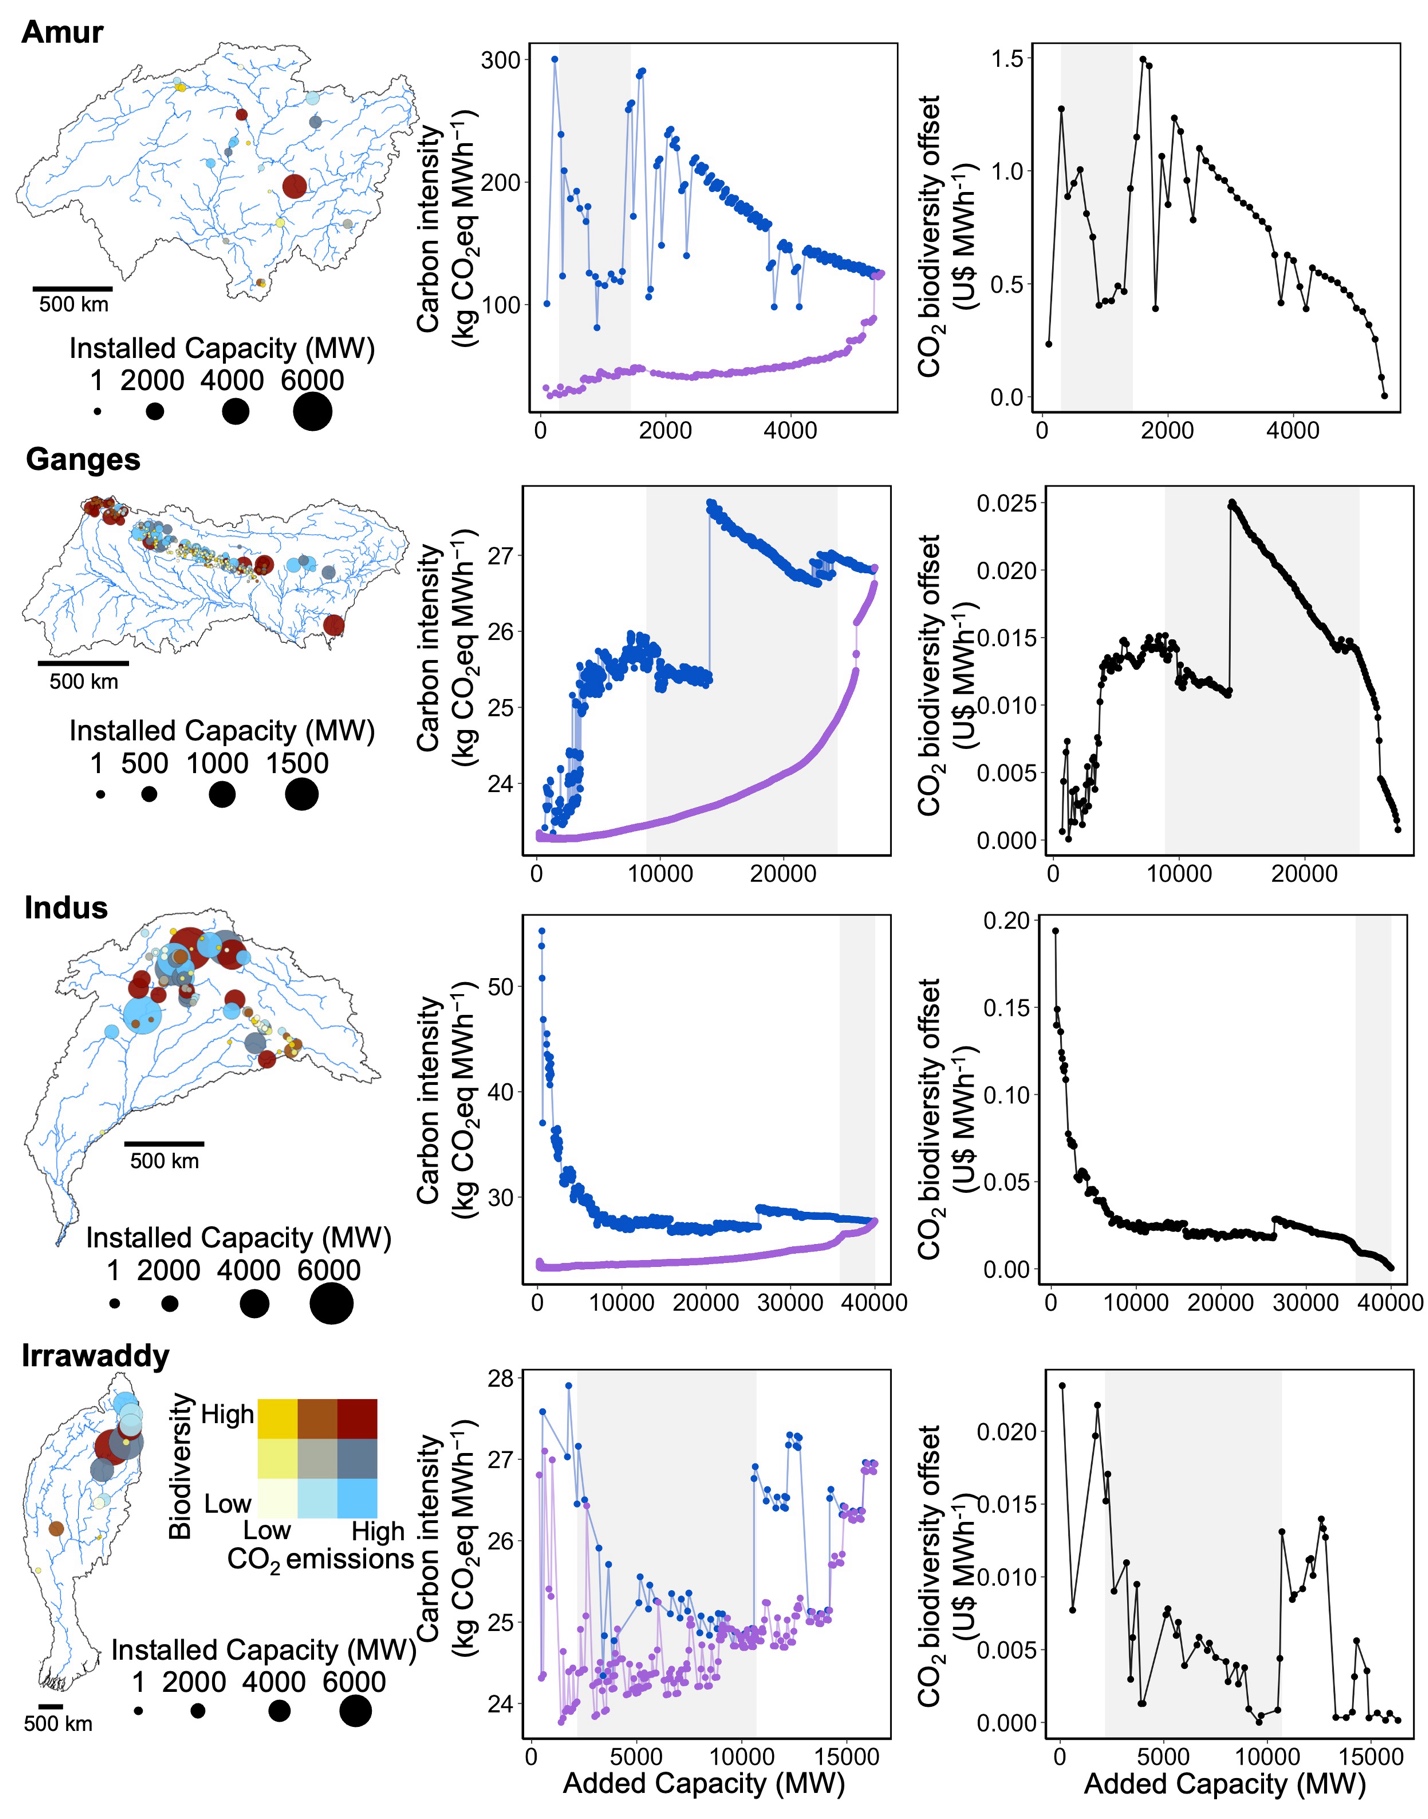


**Fig. S8. Biodiversity-centered hydropower planning can more than triple carbon intensities in comparison to low-carbon planning in a subset of Asian basins.** First column: Dams vary in their biodiversity impacts, carbon emissions and energy capacity. Second column: Thus, basin-wide Pareto optimal solutions for low-carbon hydropower planning (purple) have lower carbon intensities than Pareto optimal solutions for biodiversity-centered planning (blue). Third column: Offsetting carbon emissions from biodiversity-centered planning to levels equivalent to those associated with lowest-carbon dam portfolios depends on the additional capacity installed, and varies across basins. The grey shaded area represents the potential range of future hydropower expansion for each basin from ref. (*10*).


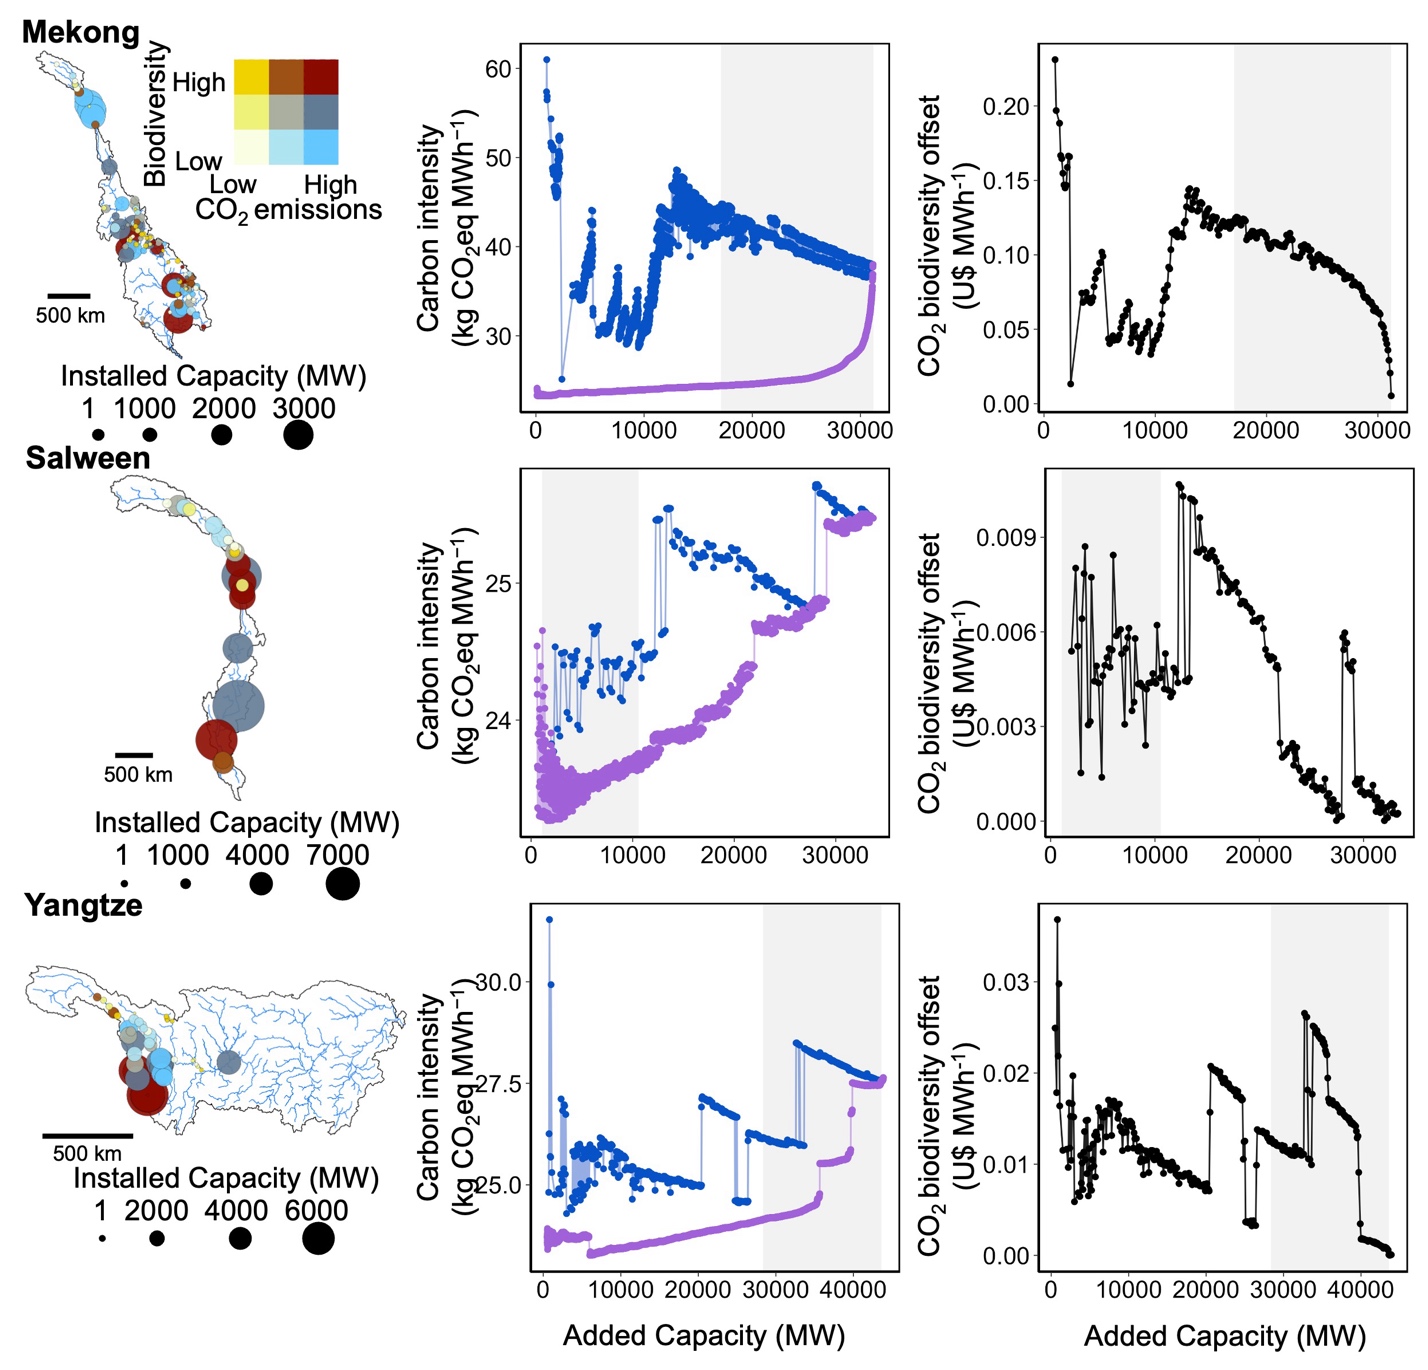


**Fig. S9. Biodiversity-centered hydropower planning can more than triple carbon intensities in comparison to low-carbon planning in a second subset of Asian basins.** First column: Dams vary in their biodiversity impacts, carbon emissions and energy capacity. Second column: Thus, basin-wide Pareto optimal solutions for low-carbon hydropower planning (purple) have lower carbon intensities than Pareto optimal solutions for biodiversity-centered planning (blue). Third column: Offsetting carbon emissions from biodiversity-centered planning to levels equivalent to those associated with lowest-carbon dam portfolios depends on the additional capacity installed, and varies across basins. The grey shaded area represents the potential range of future hydropower expansion for each basin from ref. (*10*).

**
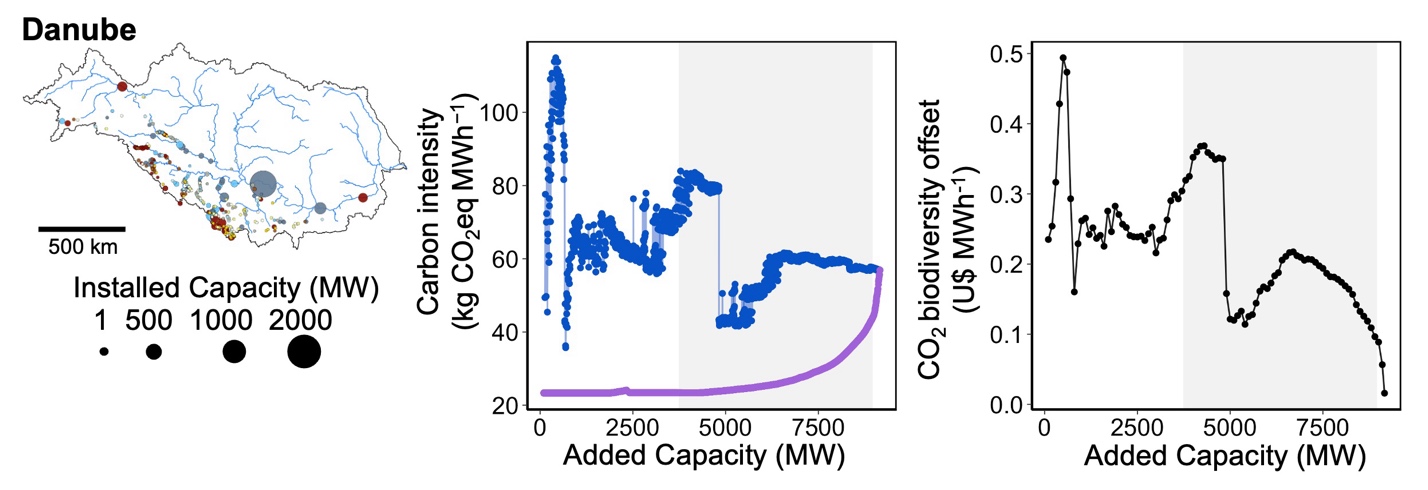
Fig. S10. Biodiversity-centered hydropower planning can more than triple carbon intensities in comparison to low-carbon planning in a second subset of Asian basins.** First column: Dams vary in their biodiversity impacts, carbon emissions and energy capacity. Second column: Thus, basin-wide Pareto optimal solutions for low-carbon hydropower planning (purple) have lower carbon intensities than Pareto optimal solutions for biodiversity-centered planning (blue). Third column: Offsetting carbon emissions from biodiversity-centered planning to levels equivalent to those associated with lowest-carbon dam portfolios depends on the additional capacity installed, and varies across basins. The grey shaded area represents the potential range of future hydropower expansion for each basin from ref. (*10*).

**
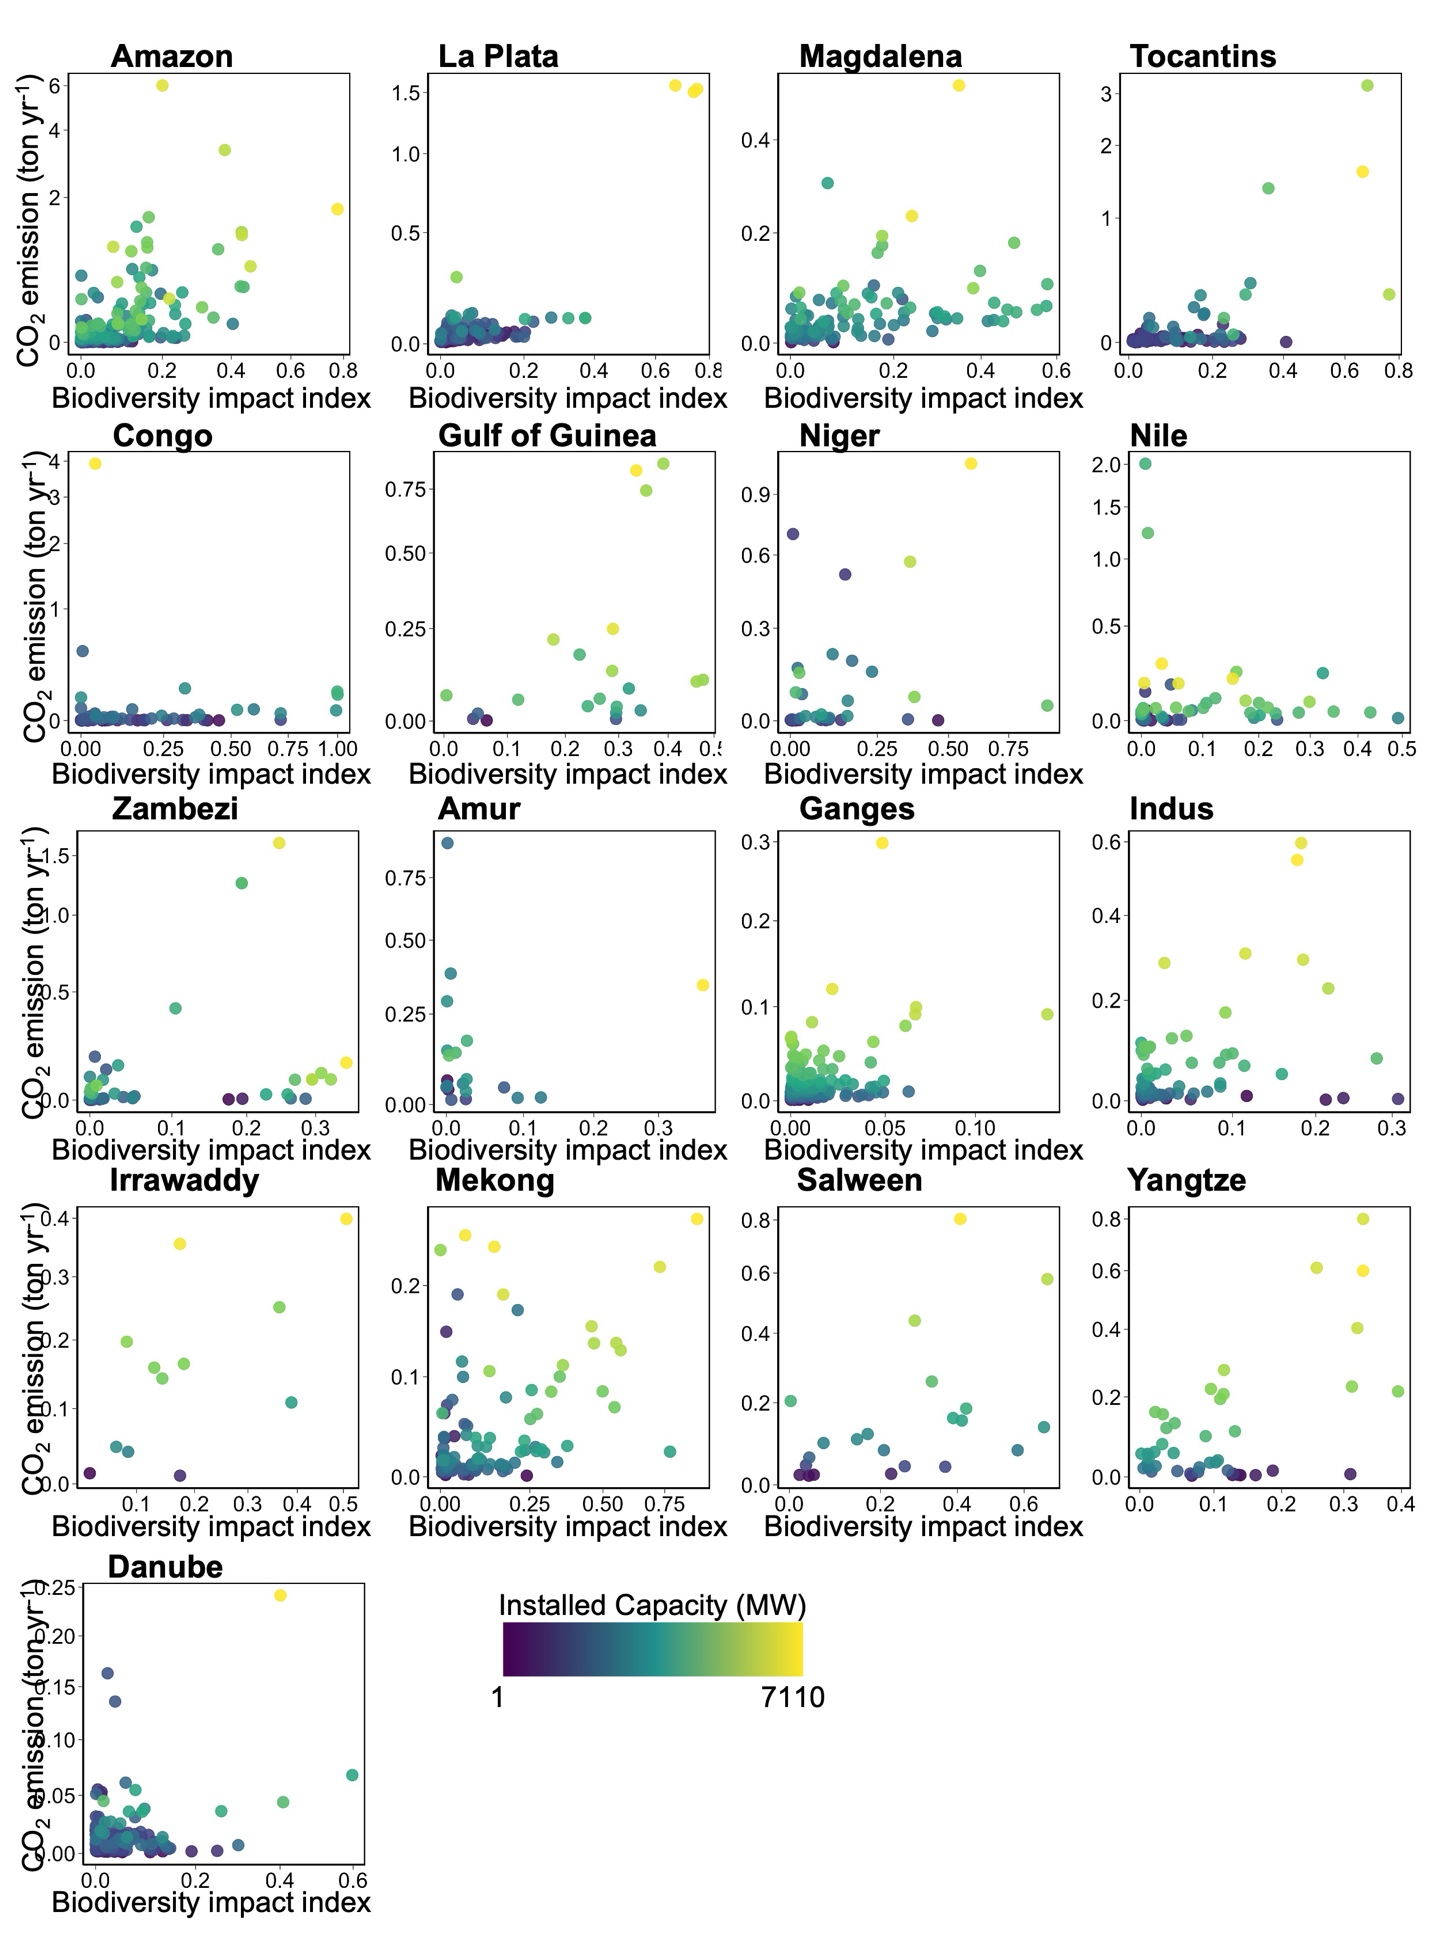
**

**Fig. S11. Dams vary in their potential impacts on fish diversity, carbon emissions and installed capacities.** Importantly, these three objectives are effectively decoupled across all river basins, and thus tradeoffs are prevalent. Each point corresponds to an individual dam colored by its installed capacity, as indicated in the legend.

**
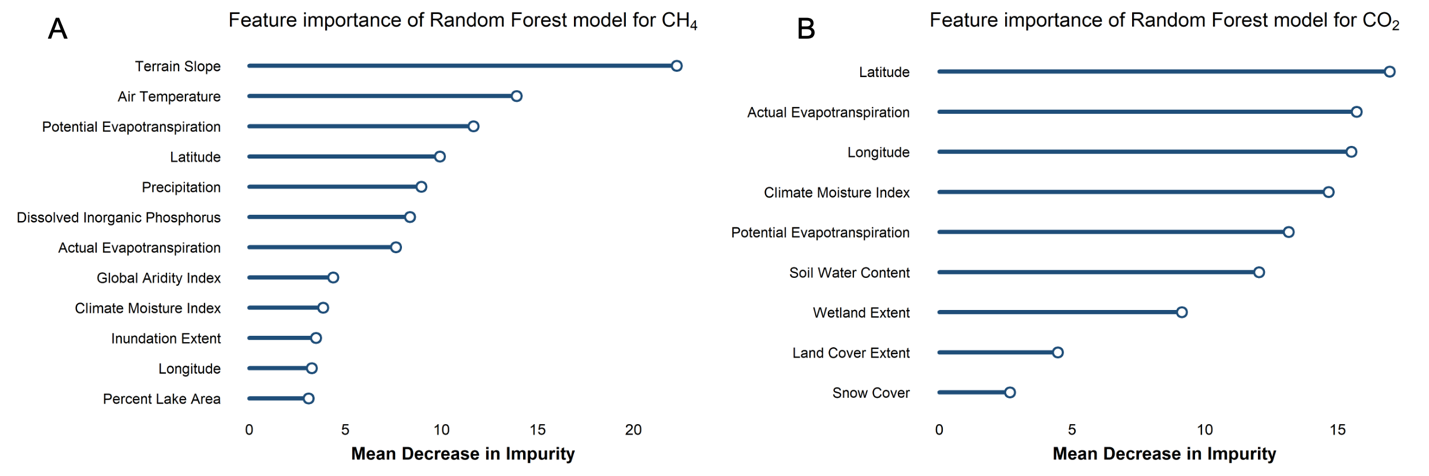
**

**Fig. S12. Feature importance for final random forest models for (A) CH4 and (B) CO2.** For variable descriptions see tables S1 and S2.

**Table S1. Final predictors included in the random forest model for CH4.**

| **Predictors** | **Description** | **Unit** | **Category** |
| --- | --- | --- | --- |
| Potential Evapotranspiration | April through September in the sub-basin. | mm | Climate |
| Actual Evapotranspiration | April through December in the sub-basin. | mm |
| Precipitation | February through December in the sub-basin. | mm |
| The Climate Moisture Index | In sub-basin and upstream | Index |
| Global Aridity Index | In sub-basin and upstream | Index |
| Air Temperature | Temperatures for May and July | Degrees Celsius |
| Terrain Slope | In sub-basin | Degree | Physiography |
| Inundation Extent | Annual minimum inundation (smn) Long-term maximum inundation (ult) | % cover | Hydrology |
| Percent Lake Area | Upstream lake area extent (use) | % cover |
| Latitude | Geographic Coordinates | Degree | Other |
| Longitude | Geographic Coordinates | Degree | Other |
| Dissolved Inorganic Phosphorus | In sub-basin Dissolved inorganic phosphorus | kg P km-2 yr-1 | Other |

**Table S2. Final predictors included in the random forest model for CO2.**

| **Predictors** | **Description** | **Unit** | **Category** |
| --- | --- | --- | --- |
| Potential Evapotranspiration | July and August in the sub-basin | mm | Climate |
| Actual Evapotranspiration | October and September in the sub-basin | mm |
| Snow Cover Extent | July in the sub-basin. | % |
| The Climate Moisture Index | June in the sub-basin | Index |
| Wetland Extent | Lakes/reservoirs, in the upstream watershed | % | Landcover |
| Land Cover Extent | Class 2 upstream | % |
| Soil Water Content | August in the sub-basin | % | Soils/Geology |
| Latitude | Geographic Coordinates | Degree | Other |
| Longitude | Geographic Coordinates | Degree | Other |
